# Supplementary material for: First-principle prediction of crystal habits in mixed solvents: α-glycine in methanol/water mixtures
Source: Royal Society of Chemistry journal article supplement (doi:10.1039/c0ce00614a), 2011-01-01
Supplement: c0ce00614a.pdf [file c0ce00614a.pdf]

# First-Principle Prediction of Crystal Habits in Mixed Solvents: $\alpha$ -Glycine in Methanol/Water Mixtures

Sivashangari Gnanasambandam, Søren Enemark and Raj Rajagopalan\*

*Department of Chemical & Biomolecular Engineering and Singapore-MIT Alliance, National University of Singapore, 4 Engineering Drive 4, 117576 (Singapore)*

## Supporting Information

**Table S1** Glycine/water/methanol mixtures for the crystal/bulk solution.

| Plane                                | (010)   | (011) |
|--------------------------------------|---------|-------|
| No. of crystalline glycine molecules | 640     | 672   |
| No. of solute glycine molecules      | 108     | 115   |
| No. of methanol molecules            | 1174    | 1303  |
| No. of water molecules               | 2827    | 2942  |
|                                      | x 4.08  | 5.26  |
| System dimensions (nm)               | y 13.59 | 13.21 |
|                                      | z 4.06  | 3.53  |

\* To whom correspondence should be addressed. E-mail: raj@nus.edu.sg

**Table S2** Orientations of the glycine molecules in a unit cell

| Plane | Molecules <sup>a</sup> | $\theta_{CC}$ | $\phi_{CC}$ | $\theta_{CN}$ |
|-------|------------------------|---------------|-------------|---------------|
| (010) | 1                      | 81°           | 290°        | 64°           |
|       | 2                      | 81°           | 110°        | 64°           |
|       | 3 <sup>b</sup>         | 99°           | 110°        | 116°          |
|       | 4                      | 99°           | 290°        | 116°          |
| (011) | 1 <sup>c</sup>         | 143°          | 25°         | 71°           |
|       | 2                      | 24°           | 228°        | 88°           |
|       | 3                      | 37°           | 204°        | 109°          |
|       | 4 <sup>c</sup>         | 156°          | 48°         | 92°           |

<sup>a</sup> Molecules numbers refer to Fig. S1. <sup>b</sup> Growth units for (010) surface. <sup>c</sup> Growth units for (011) surface.

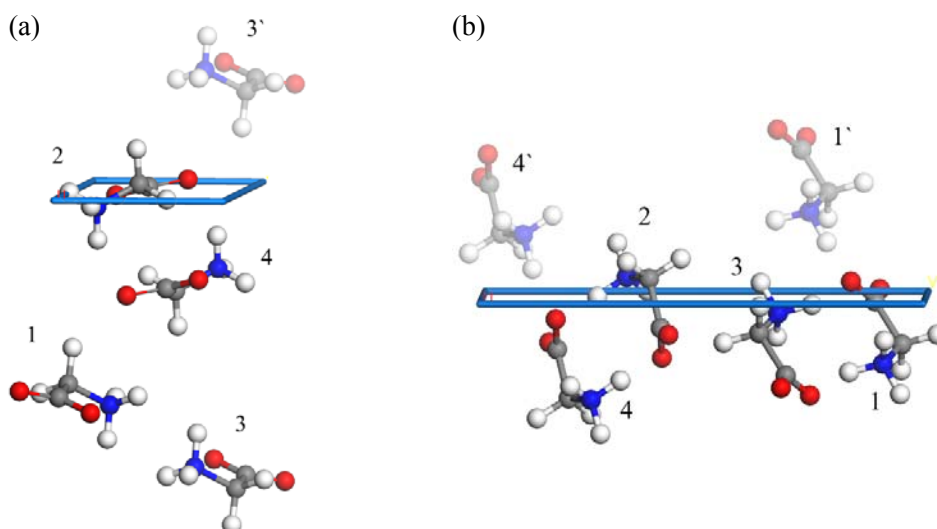

**Fig. S1** Crystalline unit cell glycine molecules (numbered 1 to 4) shown together with the growth units (shaded molecules) for a) (010) and b) (011) surface. Crystal surface plane is indicated with blue rectangle.

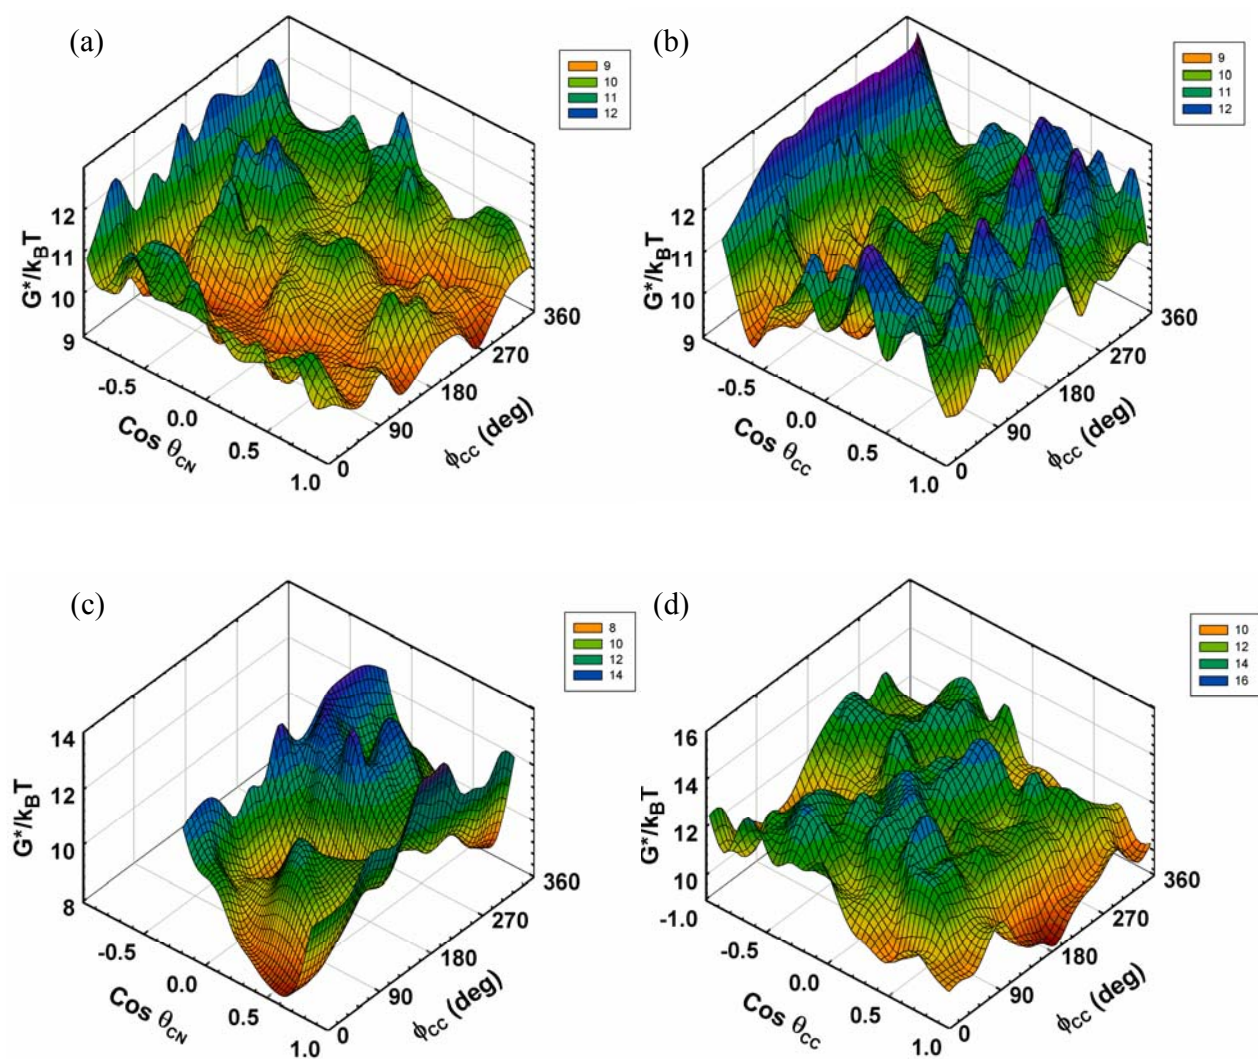

**Fig. S2** Gibbs free energy surface plots shown for a)  $\theta_{CC}=99^\circ$  and b)  $\theta_{CN}=116^\circ$  for the (010) face, and for c)  $\theta_{CC}=156^\circ$  and d)  $\theta_{CN}=92^\circ$  for the (011) face. Energy is given in units of  $k_B T$ . Note that the actual Gibbs energy landscape is a function of the three angles,  $\theta_{CC}$ ,  $\phi_{CC}$  and  $\theta_{CN}$ , and hence is 4-dimensional. Here we show 3-dimensional surface plots where one angle is kept fixed. The surface plots correspond to the contour plots in Fig. 2, where the orientations of the growth units are also indicated.

**Table S3** Molecular-level crystallographic properties and solvent-dependent properties and relative growth rate for the (010) and (011) planes of the glycine crystal.

| Plane                                                                                      | (010)  | (011)   |
|--------------------------------------------------------------------------------------------|--------|---------|
| Inter-planar distance, $d_{(hkl)}$ (nm)                                                    | 1.1969 | 0.46741 |
| Coordination number, $n_{(hkl)}$                                                           | 4      | 4       |
| Crystallographic orientation factor <sup>a</sup> , $\xi_{hkl} = E_{hkl}^{slice} / E^{cr}$  | 0.9266 | 0.3671  |
| Effective concentration of growth unit, $X_{A(hkl)}^{eff}$                                 | 0.0095 | 0.0100  |
| Surface scaling factor <sup>b</sup> , $C_{l(hkl)}^* \equiv \ln X_{A(hkl)}^{eff} / \ln X_A$ | 1.2799 | 1.2671  |
| Relative growth rate <sup>c</sup> , $R_{hkl}^{rel}$                                        | 1      | 10      |

<sup>a</sup>  $E^{cr}$  refers to the lattice energy of the crystal and is equal to 306.018 kJ/mol. <sup>b</sup>  $X_A$  refers to the bulk concentration of glycine and is equal to 0.026. <sup>c</sup> The experimental value for the enthalpy of dissolution ( $\Delta H^{diss}/k_B T$ ) is 12.47 in methanol/water systems (B. Palecz, Fluid Phase Equilib., 1996, **126**, 299-303.)
